# Supplementary material for: 1-Vinylazulenes with Oxazolonic Ring-Potential Ligands for Metal Ion Detectors; Synthesis and Products Properties
Source: MDPI journal article supplement (doi:10.3390/sym13071209), 2021-07-06
Supplement: s1 [file s1]

## Supporting Information

### Synthesis and properties of 1-vinyl azulenes with oxazolonc ring- potential ligands for metal ion detectors

Mihaela Cristea<sup>a</sup>, Liviu Birzan<sup>a</sup>, Florea Dumitrascu<sup>a</sup>, Cristian Enache<sup>b</sup>, Victorita Tecuceanu<sup>a</sup>, Anamaria Hanganu<sup>a</sup>, Constantin Draghici<sup>a</sup>, Calin Deleanu<sup>a</sup>, Alina Nicolescu<sup>a</sup>, Maria Maganu<sup>a</sup> and Alexandru C. Razus<sup>a,\*</sup>

<sup>a</sup> Institute of Organic Chemistry „ C. D. Nenitescu” of Roumanian Academy, 202 B, Splaiul Independentei, 060023, Bucharest, Romania

<sup>b</sup> National Phytosanitary Laboratory, Voluntari, Romania

*\*E-mail: acrazus@yahoo.com*

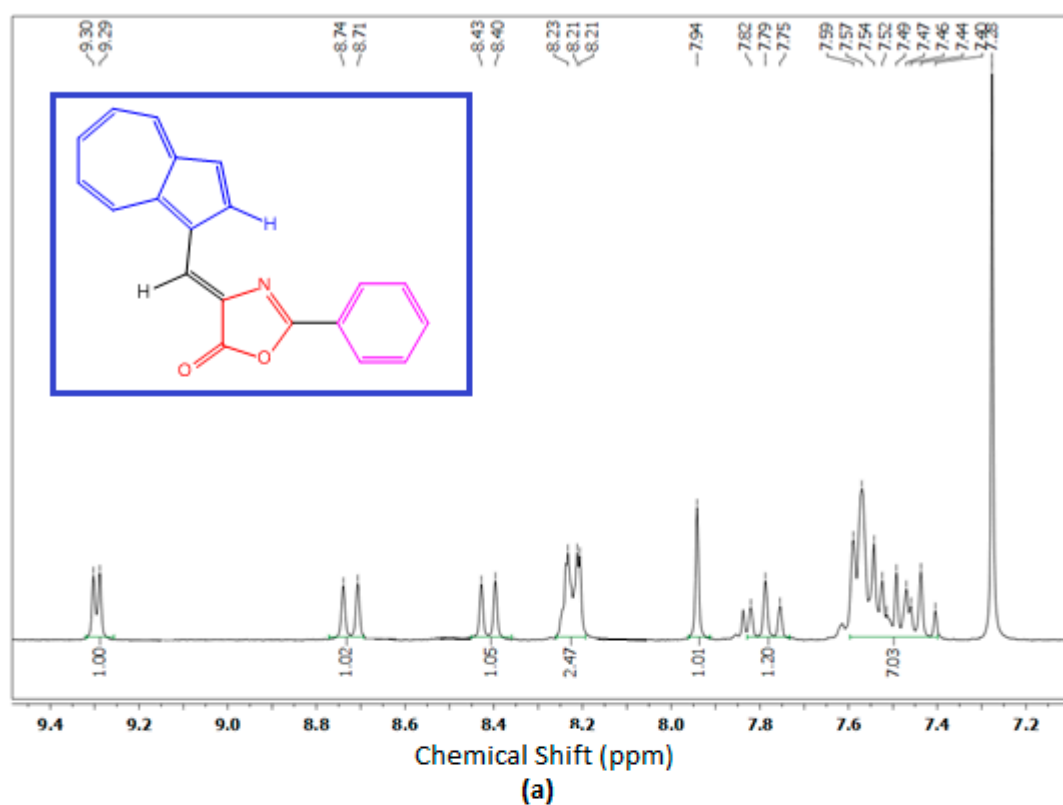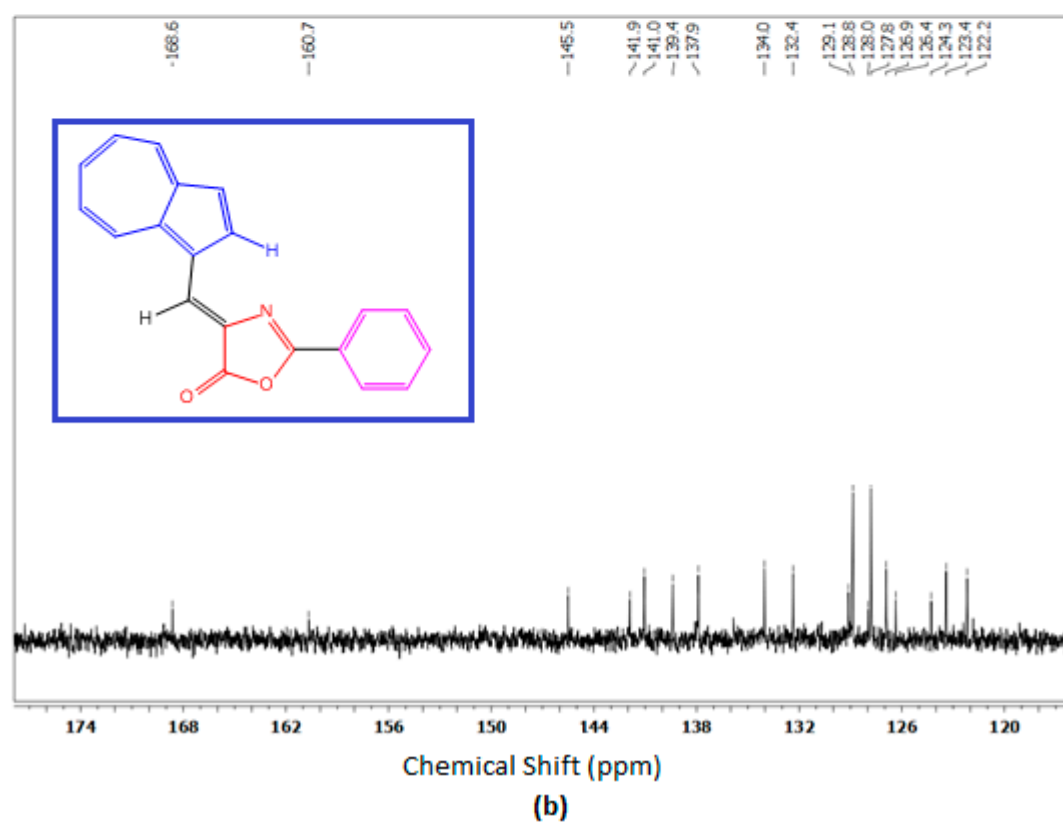

**Figure S1.** (a)  $^1\text{H}$  NMR, and (b)  $^{13}\text{C}$  NMR spectra of 4-(azulen-1-ylmethylene)-2-phenyloxazol-5(4H)-one **6a**

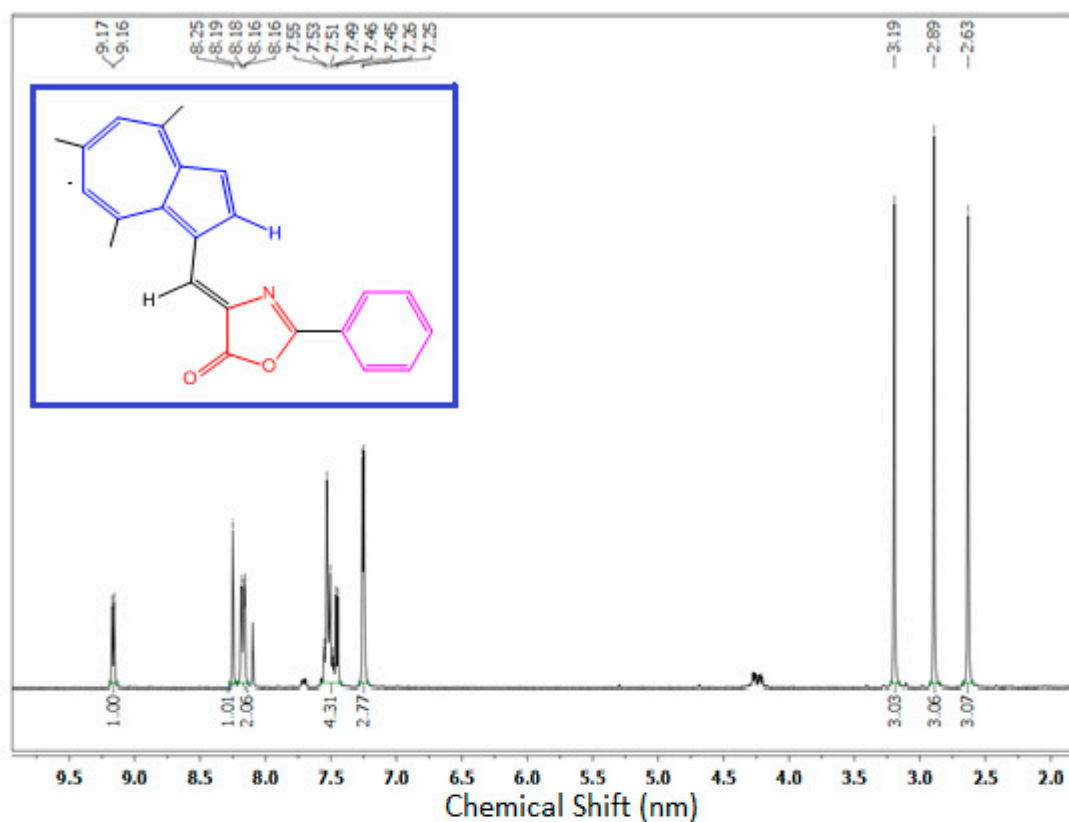

(a)

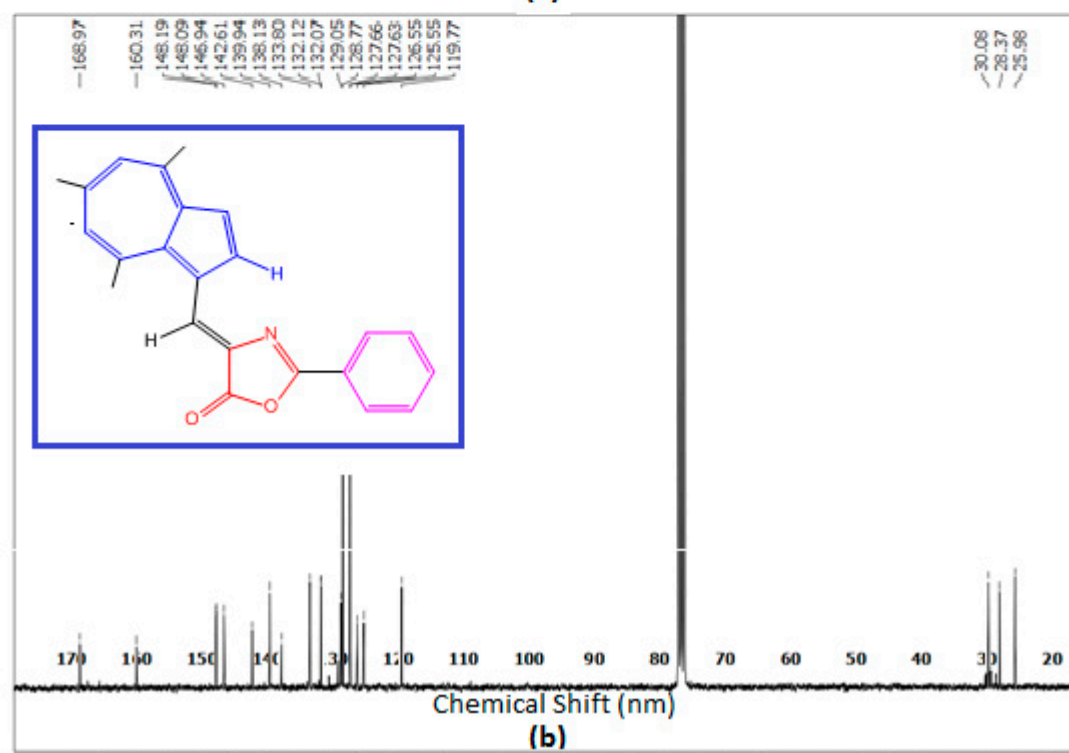

(b)

**Figure S2.** (a) <sup>1</sup>H NMR, and (b) <sup>13</sup>C NMR spectra of 2-phenyl-4-((4,6,8-trimethylazulen-1-yl)methylene)oxazol-5(4H)-one **6b**

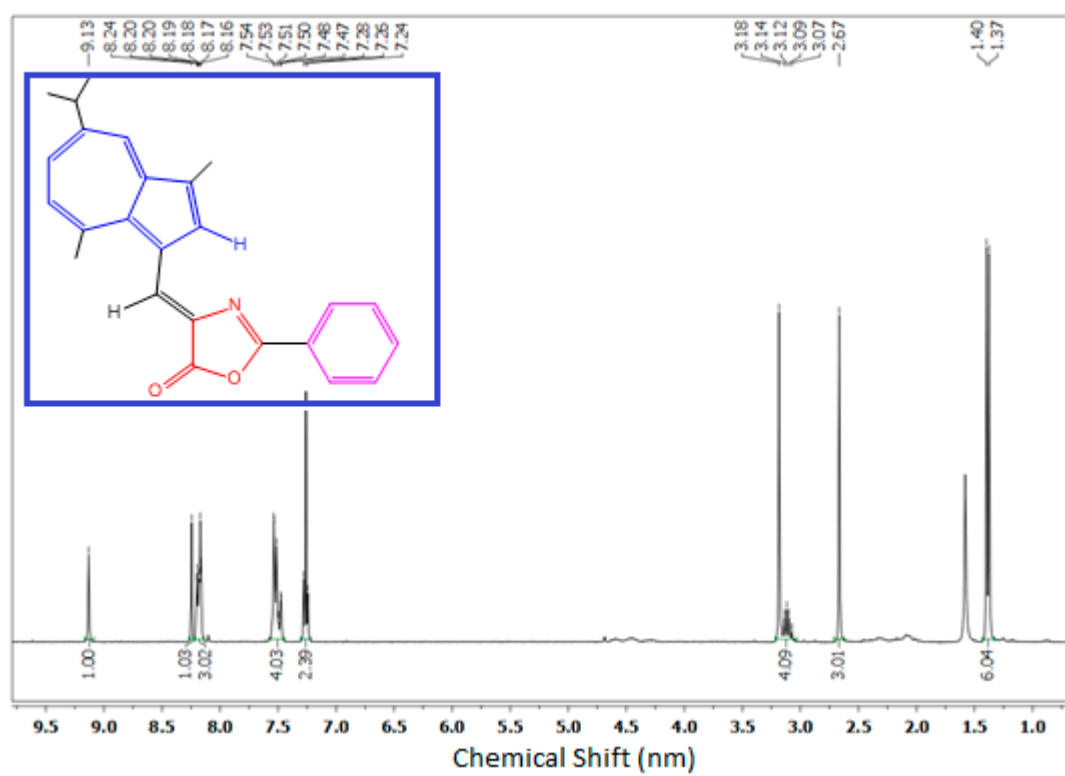

(a)

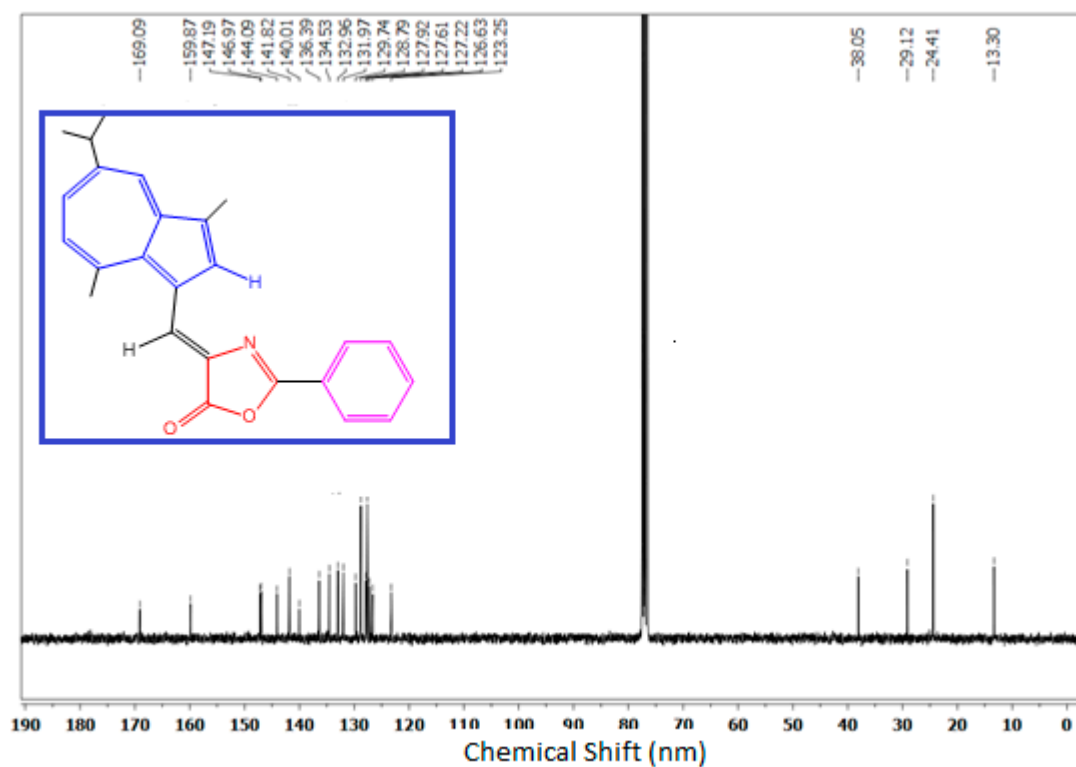

(b)

**Figure S3.** (a) <sup>1</sup>H NMR, and (b) <sup>13</sup>C NMR spectra of 4-((5-isopropyl-3,8-dimethylazulen-1-yl)methylene)-2-phenyloxazol-5(4H)-one **6c**

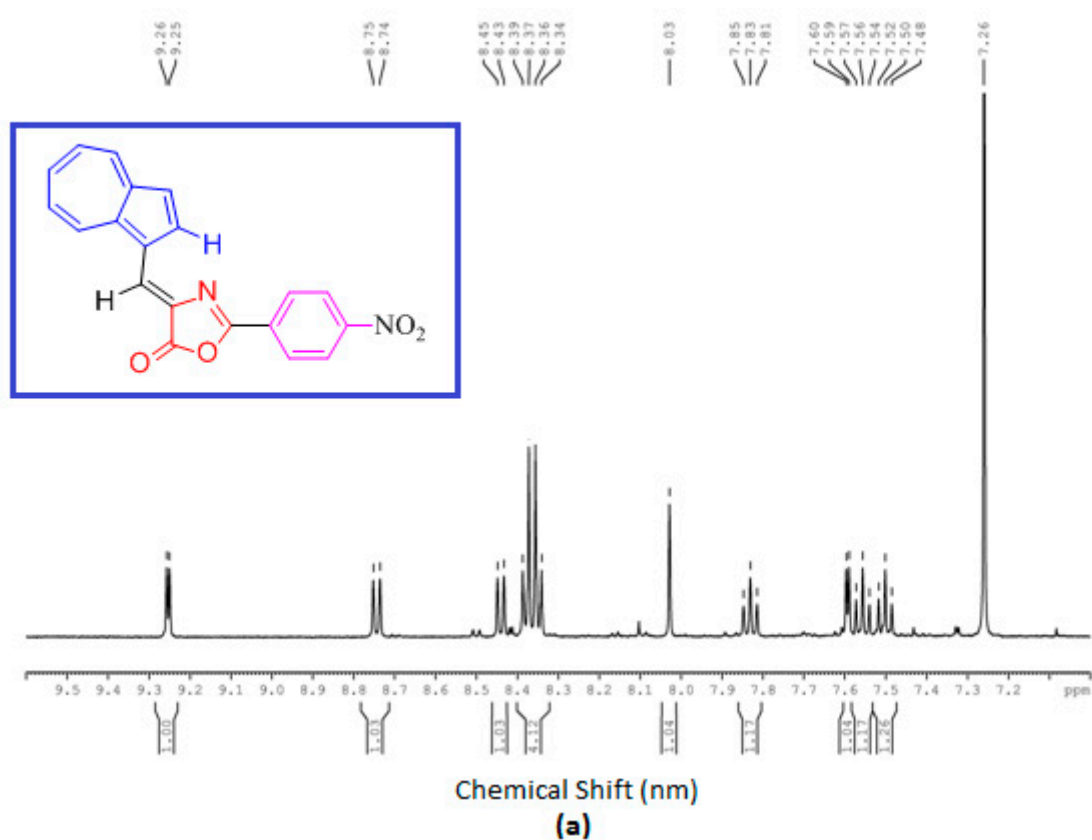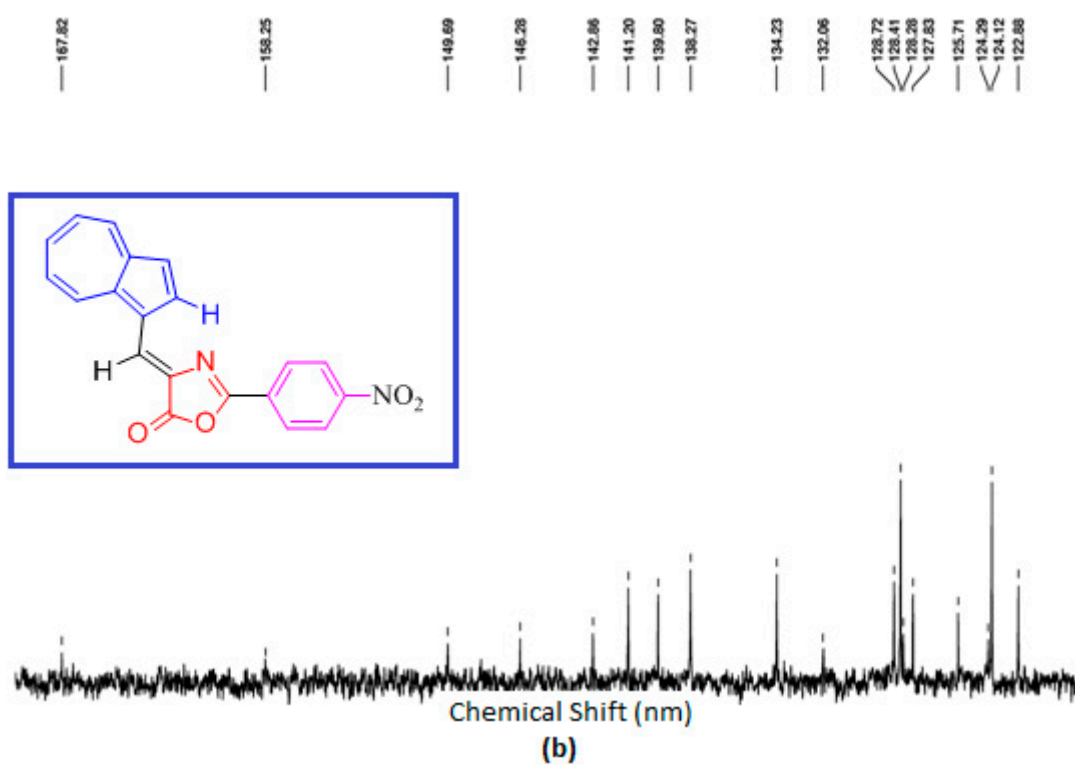

**Figure S4.** (a) <sup>1</sup>H NMR, and (b) <sup>13</sup>C NMR spectra of 4-(azulen-1-ylmethylene)-2-(4-nitrophenyl)oxazol-5(4H)-one 6d

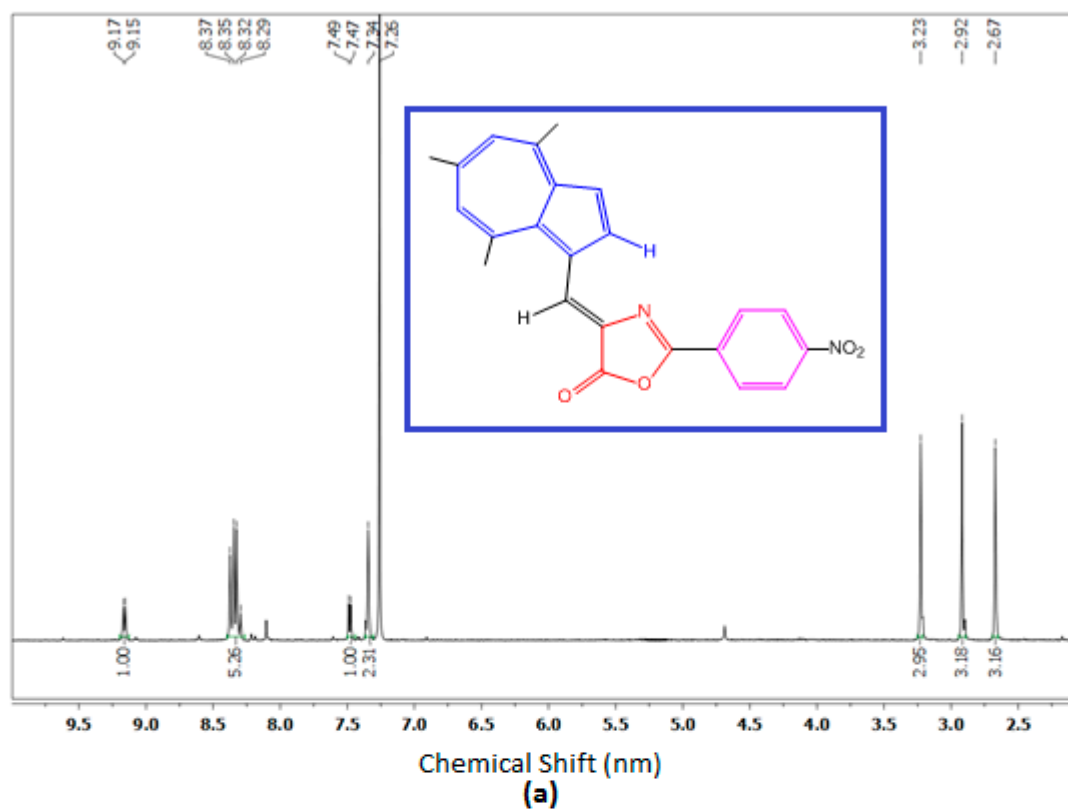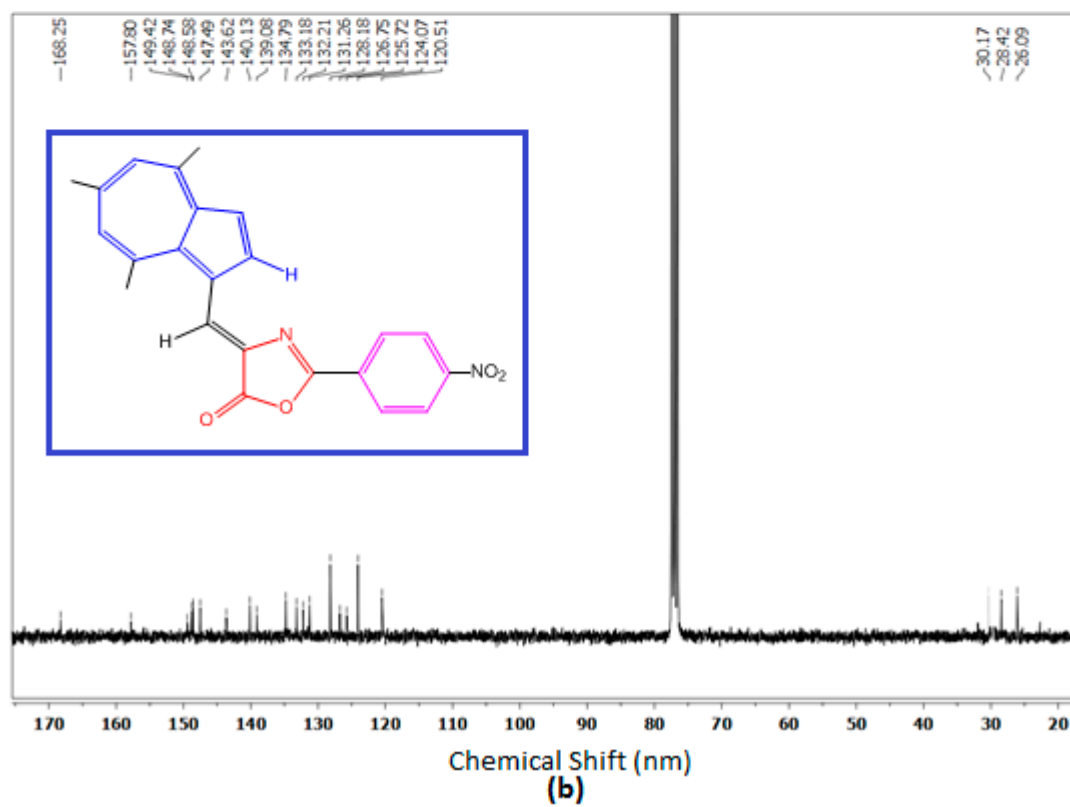

**Figure S5.** (a)  $^1\text{H}$  NMR, and (b)  $^{13}\text{C}$  NMR spectra of 2-(4-nitrophenyl)-4-((4,6,8-trimethylazulen-1-yl)methylene)oxazol-5(4H)-one **6e**

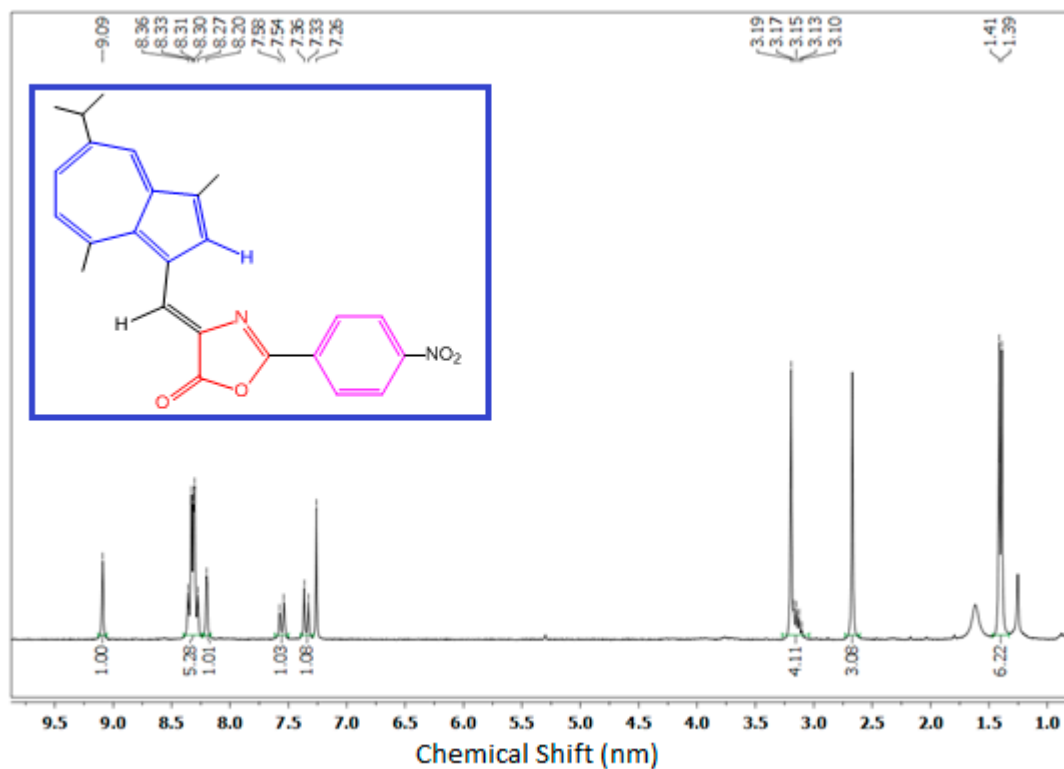

(a)

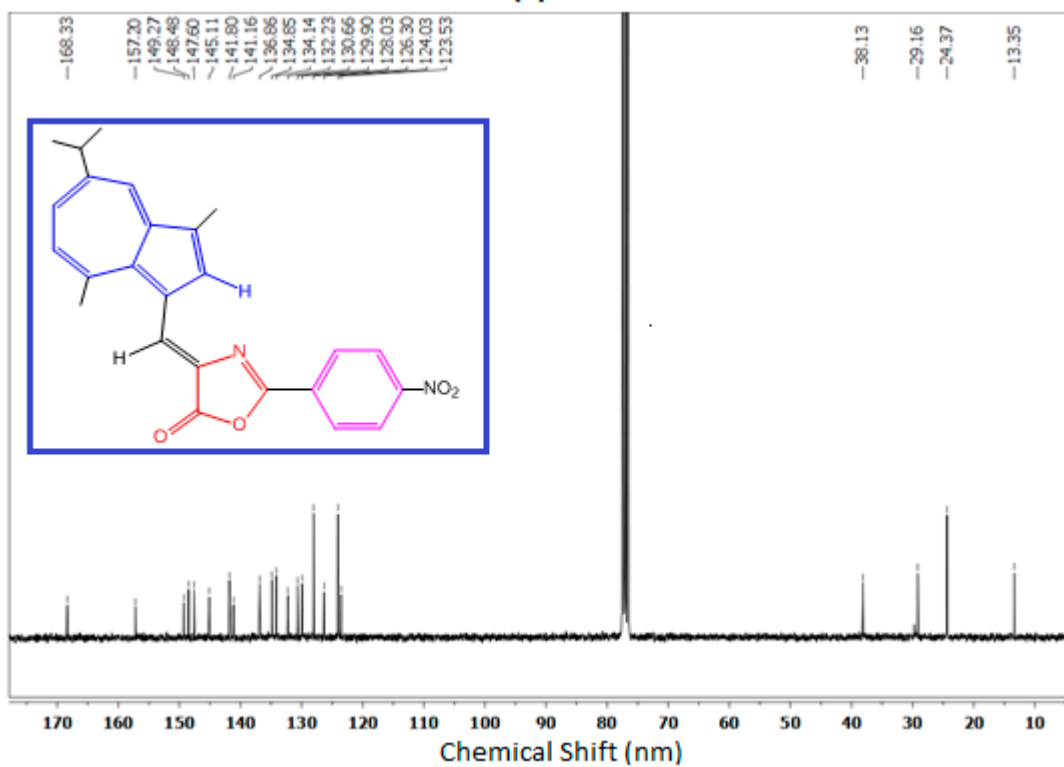

(b)

**Figure S6.** (a) <sup>1</sup>H NMR, and (b) <sup>13</sup>C NMR spectra of 4-((5-isopropyl-3,8-dimethylazulen-1-yl)methylene)-2-(4-nitrophenyl)oxazol-5(4H)-one **6f**
